# Supplementary material for: Electronic reporting of integrated disease surveillance and response: lessons learned from northeast, Nigeria, 2019
Source: Springer Nature journal article supplement (doi:10.1186/s12889-021-10957-9), 2021-05-13
Supplement: MOESM1 [file 19160984]

# eIDSR Evaluation, Health Facility Questionnaire

---

**1) Date**

**2) What is your name?**

**3) What is your title?**

**4) What is your telephone number?**

**5) What is your email?**

**6) LGA Name**

**7) Health Facility Name**

**8) Health Facility Type**

Public

Private

Other - Write In:

**9) What is the estimated catchment population of your health facility as of 2018?**

**10) Describe your understanding of eIDSR.**

**11) What is your role in eIDSR?**

**12) What phone do you use for eIDSR?**

**13) What else is the eIDSR phone used for?**

**14) In your view, was eIDSR well designed to suit your health facility?**

- Yes
- No

**15) Please explain your answer to the question above.**

**16) Is the eIDSR easy to use?**

Yes

No

Don't know - Write In (Required):  \*

**17) Was there any alert detected in the last 3 months?**

Yes

No

**18) If you answered 'Yes' to the question above please describe it.**

**19) What was the time interval (in hours) between detection and notification of the last alert through eIDSR?**

**20) Did you use the data generated from eIDSR for action at this health facility?**

Yes

No

**21) Is your phone regularly charged?**

Yes

No

**22) Do you back up the data on your eIDSR phone?**

Yes

No

**23) If you answered "Yes" please explain how you conduct the backup.**

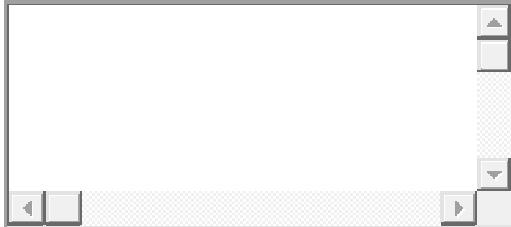

**24) What is your source of charging your eIDSR mobile phone battery?**

**25) Do you always have airtime (credit) on the eIDSR phone?**

Yes

No

**26) Did you receive any training prior to the implementation of eIDSR?**

Yes

No

**27) Have you received a supervisory visit from the higher level since you began implementing eIDSR?**

Yes

No

**28) If "Yes" to the question above, how many supervisory visits have you received?**

**29) Do you find the eIDSR application simple to use?**

Yes

No

**30) Please explain your answer above.**

An empty text input field with a light gray background and a thin border. It features a vertical scrollbar on the right side and horizontal scrollbars at the bottom, indicating it is a multi-line text area.

**31) Is there a paper-based back up for eIDSR?**

Yes

No

Other - Write In:

**32) What value has eIDSR added to your surveillance system?**

An empty text input field with a light gray background and a thin border. It features a vertical scrollbar on the right side and horizontal scrollbars at the bottom, indicating it is a multi-line text area.

**33) Has the eIDSR application ever crashed?**

Yes

No

**34) If you answered Yes to the question above, please explain what happened and how you resolved it.**

An empty text input field with a light gray background and a thin border. It features a vertical scrollbar on the right side and horizontal scrollbars at the bottom, indicating it is a multi-line text area.

**35) Do you think eIDSR should be scaled up to the rest of the country?**

Yes

No

**36) Please explain your answer above.**



**37) Does the eIDSR program add additional burden to your work?**

Yes

No

**38) If you answered Yes please explain your answer.**



**39) What were the major challenges in using eIDSR?**



**40) What would Nigeria lose if eIDSR was not scaled up?**

An empty rectangular text box with a thin black border. It features a vertical scrollbar on the right side and a horizontal scrollbar at the bottom, both with standard arrow and track icons.

**41) Please provide any other comments on your experience with operating eIDSR.**

An empty rectangular text box with a thin black border. It features a vertical scrollbar on the right side and a horizontal scrollbar at the bottom, both with standard arrow and track icons.

---

**Thank You!**

---
